# Supplementary material for: Univariable and multivariable Mendelian randomization investigating the effects of telomere length on the risk of adverse pregnancy outcomes
Source: Front Endocrinol (Lausanne). 2023 Aug 3;14:1225600. doi: 10.3389/fendo.2023.1225600 (PMC10435990; doi:10.3389/fendo.2023.1225600)
Supplement: Supplementary file 15 [file Table_3.xlsx]

## Sheet: Sheet1
Supplementary Table S3.Data for 109 SNPs as IVs in TL and PE
SNP	chr	pos	Effect allele	Other allele	Beta of exposure	SE of exposure	P of exposure	Beta of outcome	SE of outcome	P of outcome	R2	F statistics
rs1003322	22	51072289	A	C	0.0141734	0.00247546	1e-08	0.0566	0.0334	0.0905003	6.94e-05	32.7819
rs10112752	8	73958718	A	G	-0.0287522	0.00202518	9.5e-46	-0.004	0.0238	0.8662	0.000426705	201.564
rs10768683	11	5247791	G	C	0.0469922	0.00277015	1.5e-64	0.0195	0.0293	0.5055	0.000609086	287.768
rs10805346	4	9920347	C	T	0.0117072	0.00202147	7e-09	0.018	0.0238	0.4487	7.1e-05	33.5405
rs10840270	11	9629553	G	C	0.014383	0.00212494	1.3e-11	0.0034	0.0252	0.8931	9.7e-05	45.8146
rs10845387	12	11757743	A	G	-0.0141214	0.00209396	1.5e-11	-0.0073	0.0256	0.7742	9.63e-05	45.4796
rs10905255	10	5870267	T	G	-0.0182493	0.00203099	2.6e-19	-0.0449	0.0238	0.0595498	0.000170962	80.7374
rs11085072	19	4368142	T	C	-0.0131806	0.00236713	2.6e-08	-0.0327	0.0323	0.3105	6.57e-05	31.0045
rs11117354	16	88092092	C	T	0.0232506	0.00219601	3.4e-26	0.0203	0.0239	0.3966	0.000237353	112.098
rs111527438	17	29252703	C	T	0.0125	0.00211016	3.1e-09	0.0262	0.0253	0.301	7.43e-05	35.0903
rs111950327	16	48283993	C	G	0.0238271	0.00409406	5.9e-09	0.0149	0.0528	0.777401	7.17e-05	33.8713
rs112394943	3	197842892	C	T	-0.0198961	0.00281641	1.6e-12	0.0327	0.0281	0.244	0.000105681	49.9048
rs113525195	14	23499321	A	C	-0.0124075	0.00224132	3.1e-08	0.0459	0.0258	0.0753894	6.49e-05	30.645
rs11412296	15	50366116	T	A	0.0332259	0.00234478	1.4e-45	-0.0082	0.0279	0.768599	0.000425072	200.792
rs11579626	1	146741960	C	A	0.0265113	0.00357752	1.3e-13	-0.0944	0.0361	0.00893408	0.000116291	54.9156
rs11584821	1	114419489	T	C	-0.0306517	0.00263623	3e-31	0.0092	0.0308	0.765301	0.000286231	135.189
rs116863223	18	709396	A	G	-0.0817874	0.00937157	2.6e-18	0.1215	0.0949	0.2002	0.000161278	76.1634
rs117407747	7	159117178	T	C	0.0450533	0.00611706	1.8e-13	-0.0587	0.1255	0.6399	0.000114872	54.2458
rs117512405	20	62574274	A	G	-0.0790134	0.00824611	9.5e-22	0.0474	0.0523	0.3649	0.000194409	91.8124
rs117630647	7	124779510	A	G	0.059565	0.00720413	1.4e-16	0.0337	0.0923	0.7151	0.000144762	68.3624
rs11769630	7	50257703	A	T	-0.0256807	0.00389475	4.3e-11	0.0143	0.0393	0.715501	9.21e-05	43.4763
rs11991877	8	56664524	A	T	-0.030138	0.00318686	3.2e-21	0.0231	0.0338	0.4938	0.000189373	89.4337
rs12369950	12	24762109	C	T	-0.0178308	0.00290205	8e-10	0.0589	0.033	0.0740406	7.99e-05	37.7511
rs12412214	10	101276256	A	G	-0.0245174	0.00222685	3.4e-28	-0.0174	0.0242	0.4711	0.000256657	121.217
rs12925933	16	90141355	C	A	-0.0146622	0.00213796	7e-12	0.01	0.0238	0.673501	9.96e-05	47.0324
rs12932179	16	9072085	G	A	-0.0136257	0.0020276	1.8e-11	-0.0033	0.0243	0.8915	9.56e-05	45.1597
rs13062095	3	101267385	C	T	0.0138552	0.00214113	9.7e-11	-0.0467	0.0244	0.0552803	8.87e-05	41.8733
rs13230646	7	23930316	C	T	-0.0173277	0.00232377	8.9e-14	0.0073	0.0315	0.8174	0.000117745	55.6024
rs137901416	14	73418095	A	G	0.04572	0.00332355	4.7e-43	-0.0111	0.048	0.817	0.000400619	189.237
rs139669835	18	729871	T	C	-0.0612563	0.0105346	6.1e-09	-0.3088	0.3309	0.3508	7.16e-05	33.8114
rs139795227	1	92842367	C	A	0.0599379	0.00873247	6.7e-12	-0.0273	0.0713	0.701601	9.98e-05	47.1115
rs141214782	5	78954683	A	T	-0.0246687	0.00335723	2e-13	-0.0032	0.0386	0.9349	0.000114335	53.9919
rs142426306	20	62488152	T	C	-0.0504903	0.00539933	8.7e-21	0.0069	0.0613	0.9098	0.000185163	87.4449
rs143190905	20	62291767	T	G	-0.0723995	0.00369421	1.6e-85	0.0896	0.0447	0.0450402	0.00081278	384.084
rs144204502	17	76183233	T	C	-0.100574	0.00913369	3.4e-28	0.0846	0.0616	0.1695	0.000256723	121.249
rs145114957	1	94322469	G	C	0.0272605	0.00498872	4.6e-08	0.0069	0.0612	0.9106	6.32e-05	29.8598
rs150150565	18	708207	T	C	0.063762	0.00739877	6.8e-18	0.0209	0.0875	0.8109	0.000157266	74.2682
rs1611236	6	29748690	A	G	-0.0160135	0.00213359	6.1e-14	0.0342	0.0297	0.2498	0.000119288	56.3312
rs16978028	18	42070981	T	A	-0.029945	0.00285068	8.2e-26	-0.0123	0.0434	0.776499	0.000233641	110.344
rs17445108	12	57082058	A	G	-0.0168922	0.00300983	2e-08	-0.0836	0.0362	0.0209402	6.67e-05	31.4983
rs182059586	16	14652220	C	T	-0.0571159	0.00680853	4.9e-17	-0.1221	0.1413	0.3875	0.000149019	70.3729
rs185174247	5	138914024	A	G	0.0372806	0.00435145	1.1e-17	0.0504	0.0697	0.4697	0.000155428	73.4
rs188918174	2	54473646	T	C	0.0403062	0.00543604	1.2e-13	-0.1427	0.0559	0.01071	0.00011642	54.9764
rs1907702	12	88955469	A	G	0.0150247	0.00242651	5.9e-10	0.0498	0.0294	0.0901696	8.12e-05	38.3394
rs1957937	14	96181360	T	A	0.0209365	0.00273361	1.9e-14	-0.0233	0.0305	0.4438	0.000124216	58.6588
rs1985369	7	159119220	G	A	-0.0311893	0.00300952	3.6e-25	-0.0329	0.0376	0.3825	0.000227413	107.403
rs2056726	7	99780283	A	G	-0.0228078	0.00243638	7.9e-21	0.0088	0.0283	0.755899	0.000185564	87.6345
rs2538745	7	76310784	C	T	-0.012942	0.002056	3.1e-10	-0.0044	0.0236	0.8518	8.39e-05	39.6237
rs2555104	2	17841243	C	A	-0.0139717	0.00203498	6.6e-12	0.0175	0.0236	0.4586	9.98e-05	47.1386
rs28363070	5	1415068	A	G	0.0755557	0.00959987	3.5e-15	-0.137	0.2708	0.612999	0.000131173	61.9444
rs28502153	22	17469049	A	C	-0.0215916	0.00206208	1.2e-25	-0.0328	0.0244	0.1781	0.000232143	109.637
rs2977608	1	768253	C	A	0.0129483	0.00233716	3e-08	-0.0374	0.0256	0.1442	6.5e-05	30.6935
rs3093888	14	20812951	A	G	-0.028973	0.00452459	1.5e-10	-0.0227	0.0414	0.583399	8.68e-05	41.004
rs35446936	3	169486508	A	G	-0.0940025	0.00232918	1e-200	0.0229	0.0266	0.3887	0.00343776	1628.81
rs35640778	20	62321128	A	G	-0.209011	0.00702087	9.59e-195	0.1118	0.1032	0.2786	0.00187344	886.247
rs3767952	1	41231032	A	G	0.0134472	0.00238826	1.8e-08	0.0473	0.0283	0.09448	6.71e-05	31.7029
rs3785074	16	69406986	G	A	0.023863	0.00220455	2.6e-27	0.0071	0.0291	0.8077	0.000248085	117.168
rs41269079	1	45252015	A	T	0.0153617	0.0025499	1.7e-09	0.0011	0.029	0.9702	7.69e-05	36.2936
rs41304832	20	62375508	A	G	0.0611702	0.0093095	5e-11	-0.0319	0.0614	0.6031	9.14e-05	43.1743
rs4498805	1	110910397	T	G	0.0150601	0.00200376	5.7e-14	0.0062	0.0236	0.790999	0.000119622	56.4888
rs4530278	19	33752994	T	G	0.0138793	0.0020567	1.5e-11	-0.0381	0.0242	0.1146	9.64e-05	45.5398
rs45604339	14	65543102	T	C	-0.020433	0.00211433	4.3e-22	-0.011	0.0242	0.6509	0.000197756	93.3936
rs4616688	3	160042459	T	G	-0.0173476	0.00200198	4.5e-18	-0.0342	0.0241	0.1571	0.000158997	75.0857
rs4724	17	7760397	A	G	-0.0547446	0.00312441	9.8e-69	-0.0284	0.0384	0.4589	0.000649774	307.004
rs4731541	7	128678236	G	C	-0.0206119	0.00205962	1.4e-23	-0.0114	0.0246	0.6417	0.000212064	100.152
rs4743037	9	109639970	T	C	0.0147971	0.00238094	5.1e-10	-0.0325	0.0288	0.2583	8.18e-05	38.6238
rs56799554	17	41456413	G	A	-0.0259793	0.00267858	3e-22	-0.0094	0.028	0.7375	0.000199185	94.0684
rs59409453	17	1666218	G	A	0.0202133	0.00230175	1.6e-18	0.0103	0.0293	0.7248	0.0001633	77.1181
rs6007020	22	45790132	C	T	0.0144904	0.00209637	4.8e-12	-0.0167	0.0247	0.4979	0.000101176	47.7775
rs6054257	20	66370	A	G	-0.0141684	0.00247729	1.1e-08	-0.0263	0.0294	0.3717	6.93e-05	32.7104
rs611646	11	108177097	A	T	-0.0368309	0.00203547	3.5e-73	0.0413	0.0242	0.0879792	0.000692934	327.411
rs61405042	7	67200	T	C	-0.0501874	0.00602955	8.5e-17	-0.0676	0.1136	0.552	0.000146708	69.2816
rs61748181	5	1294166	T	C	-0.059181	0.00595394	2.8e-23	-0.017	0.0522	0.7452	0.000209201	98.7993
rs6536702	4	164028105	A	G	0.0534148	0.00238875	9.4e-111	-0.0157	0.0303	0.6052	0.00105784	500.011
rs6584579	10	105645725	G	A	0.0114923	0.00204674	2e-08	0.0312	0.0253	0.2168	6.68e-05	31.5273
rs6587577	1	151402045	G	A	-0.0182148	0.0026359	4.8e-12	0.0143	0.0323	0.658801	0.000101122	47.7517
rs6659669	1	185315067	T	C	-0.0117091	0.00205167	1.1e-08	0.0327	0.0239	0.171	6.9e-05	32.5709
rs6669563	1	32279629	A	G	0.0182358	0.00202476	2.1e-19	-0.0297	0.0238	0.2121	0.000171762	81.1149
rs66731853	1	20916238	A	G	-0.0177791	0.00215421	1.5e-16	0.0184	0.0298	0.538	0.000144238	68.1148
rs6751209	2	43588302	C	T	-0.0140465	0.00248465	1.6e-08	0.08	0.0305	0.00863595	6.77e-05	31.9598
rs6776756	3	128215821	A	G	-0.0174439	0.00203747	1.1e-17	0.0318	0.0239	0.1833	0.000155216	73.2998
rs6790988	3	170263320	G	A	0.0145728	0.00228428	1.8e-10	-0.0079	0.0281	0.778501	8.62e-05	40.6992
rs6881568	5	1670265	A	C	0.0169256	0.00207735	3.7e-16	-0.0747	0.0266	0.00498299	0.000140574	66.3845
rs7099229	10	96134685	A	G	-0.0153288	0.00224403	8.4e-12	-0.0051	0.0312	0.8706	9.88e-05	46.6613
rs7164950	15	56775385	G	A	0.0129362	0.00204001	2.3e-10	-0.0015	0.0239	0.9495	8.52e-05	40.2112
rs7209057	17	65705530	A	G	0.011819	0.00202865	5.7e-09	0.0068	0.0238	0.7757	7.19e-05	33.9426
rs7221585	17	76195153	T	C	0.0143271	0.00247042	6.7e-09	0.0144	0.0263	0.5838	7.12e-05	33.6336
rs73730598	5	77973	A	G	0.0273632	0.00439272	4.7e-10	0.0833	0.0473	0.0782294	8.22e-05	38.803
rs76065543	16	74678063	T	C	0.0342843	0.00290708	4.2e-32	-0.0044	0.0305	0.8862	0.000294474	139.083
rs76219171	16	50188929	A	G	0.0359839	0.00431741	7.8e-17	0.0251	0.064	0.6943	0.000147097	69.4653
rs762679	8	48885436	A	T	0.0310104	0.00285024	1.4e-27	0.006	0.0315	0.8481	0.000250635	118.372
rs76666449	12	120904895	C	T	0.0295125	0.00333186	8.2e-19	-0.0049	0.0345	0.8867	0.000166136	78.4579
rs7705526	5	1285974	A	C	0.0776022	0.00216124	1e-200	-0.0241	0.0254	0.3435	0.00272305	1289.26
rs7790856	7	124459852	T	C	-0.0437199	0.00220526	1.8e-87	0.0023	0.0284	0.9354	0.000831716	393.04
rs78491606	3	72891547	C	A	-0.0756311	0.00741168	1.9e-24	-0.0942	0.0715	0.1873	0.00022048	104.128
rs79977579	12	54694560	A	C	0.0281517	0.00343182	2.3e-16	0.0019	0.041	0.9632	0.000142494	67.2912
rs80116508	16	3650970	A	G	-0.0352672	0.00415151	2e-17	-0.0057	0.0436	0.896	0.000152813	72.1652
rs80324517	6	204031	A	G	0.0396515	0.00466286	1.8e-17	-0.0412	0.0487	0.3978	0.000153125	72.3124
rs8102497	19	57370055	A	G	-0.0149654	0.0020233	1.4e-13	0.0317	0.0238	0.1832	0.000115852	54.7084
rs8105767	19	22215441	G	A	0.0328384	0.00220117	2.5e-50	0.0399	0.0254	0.1152	0.00047114	222.564
rs869785	3	24347800	C	T	-0.0147303	0.00212801	4.4e-12	0.0406	0.025	0.1045	0.000101468	47.9153
rs871134	4	7044380	T	C	-0.0182986	0.0020263	1.7e-19	0.0282	0.0238	0.2355	0.000172684	81.5505
rs932002	1	226577306	T	C	-0.0402052	0.00279667	7.3e-47	-0.005	0.0278	0.8568	0.000437512	206.671
rs939916	11	202253	A	G	0.0241795	0.00216724	6.6e-29	-0.0337	0.0269	0.2101	0.000263551	124.474
rs9419958	10	105675946	C	T	-0.0810098	0.00293847	2.6e-167	-0.0029	0.0368	0.9364	0.00160706	760.03
rs9600019	13	73317585	T	C	0.0127134	0.00213096	2.4e-09	-0.0019	0.0244	0.9379	7.54e-05	35.5935
rs9878436	3	138244400	T	C	-0.0143407	0.00201819	1.2e-12	0.0191	0.0247	0.4399	0.000106922	50.4911
rs9940099	16	3613207	T	G	-0.033609	0.00411613	3.2e-16	-0.0037	0.0436	0.933	0.000141179	66.6701
rs9955360	18	78008334	A	C	-0.0190311	0.00299791	2.2e-10	0.05	0.0338	0.1389	8.53e-05	40.2985
